# Supplementary material for: Genetic Testing Contributes to Diagnosis in Cerebral Palsy: Aicardi-Goutières Syndrome as an Example
Source: Frontiers journal article supplement (doi:10.3389/fneur.2021.617813), 2021-04-22
Supplement: Data_Sheet_1.PDF [file Data_Sheet_1.PDF]

| GENE           | CONDITION                                                                 | OMIM<br>(CONDITION) | INHERITANCE | NEUROLOGICAL FEATURES                                                                                                           | BRAIN MRI                                                                                     | ADDITIONAL FEATURES                                    | REFERENCE (IN CASE OF<br>ABSENT OMIM NUMBER) |
|----------------|---------------------------------------------------------------------------|---------------------|-------------|---------------------------------------------------------------------------------------------------------------------------------|-----------------------------------------------------------------------------------------------|--------------------------------------------------------|----------------------------------------------|
| <b>AADC</b>    | Aromatic L-amino acid decarboxylase (AADC) deficiency                     | 608643              | AR          | Dystonia, severe neurological dysfunction, oculogyric crisis, infantile/ childhood onset                                        |                                                                                               |                                                        |                                              |
| <b>ACOX1</b>   | Peroxisomal acyl-CoA oxidase deficiency                                   | 264470              | AR          | Neonatal hypotonia, seizures, dystonia, progressive neurological dysfunction                                                    | White matter hyperintensities demyelination, leukodystrophy                                   |                                                        |                                              |
| <b>ADA2</b>    | Sneddon syndrome                                                          | 182410              | AR          | Non-inflammatory arteriopathy, cerebrovascular accidents, hemorrhage                                                            |                                                                                               | Livedo reticularis, SLE, polyarteriitis nodosa         |                                              |
| <b>ADCK3</b>   | Primary coenzyme Q10 deficiency-4/ spinocerebellar ataxia type 9          | 606980              | AR          | Cerebellar ataxia, stroke-like episodes, exercise intolerance, seizures, mild ID                                                |                                                                                               |                                                        |                                              |
| <b>ADCY5</b>   | Familial dyskinesia with facial myokymia                                  | 600293              | AD          | Dystonia, choreatic movements of limbs and facial muscles, choreoform CP                                                        |                                                                                               |                                                        |                                              |
| <b>ADD3</b>    | Spastic quadriplegic cerebral palsy-3                                     | 617008              | AR          | Spastic quadriplegia, seizures, ID, infantile onset                                                                             | White matter hyperintensities                                                                 |                                                        |                                              |
| <b>AFG3L2</b>  | early-onset spinocerebellar ataxia with spasticity and myoclonic epilepsy | 614487              | AR          | spinocerebellar ataxia with spasticity and myoclonic epilepsy                                                                   |                                                                                               |                                                        |                                              |
| <b>AGAP1</b>   | NA                                                                        | NA                  | AD (DN)     | Cerebral palsy                                                                                                                  |                                                                                               |                                                        | PMID: 31700678                               |
| <b>AHI1</b>    | Joubert syndrome-3                                                        | 608629              | AR          | Hypotonia, ataxia, spasticity                                                                                                   | molar tooth sign, cerebellar vermis hypoplasia, polymicrogyria, corpus callosum malformations |                                                        |                                              |
| <b>AIMP1</b>   | Leukodystrophy, hypomyelinating, 3                                        | 260600              | AR          | global developmental delay, lack of development, lack of speech acquisition, and peripheral spasticity                          | absence of myelination                                                                        |                                                        |                                              |
| <b>AKT3</b>    | Megalencephaly-polymicrogyria-polydactyly-hydrocephalus syndrome-2        | 615937              | AD (DN)     | Megalencephaly, seizures, ID                                                                                                    | Hydrocephalus, polymicrogyria                                                                 | Polydactyly, capillary malformations                   |                                              |
| <b>ALDH3A2</b> | Sjogren-Larsson syndrome                                                  | 270200              | AR          | ID, spastic paraparesis                                                                                                         | Leukoencephalopathy                                                                           | Ichthyosis, macular dystrophy                          |                                              |
| <b>ALDH5A1</b> | Succinic semialdehyde dehydrogenase (SSADH) deficiency                    | 271980              | AR          | developmental delay, hypotonia, mental retardation, ataxia, seizures, hyperkinetic behavior, aggression, and sleep disturbances | increased T2-weighted signals in the globus pallidi                                           |                                                        |                                              |
| <b>ALS2</b>    | Spastic paralysis, infantile onset ascending                              | 607225              | AR          | ID, spastic diplegia, facial muscle weakness, amyotrophy                                                                        | White matter hyperintensities, atrophy of motor cortex                                        | Ocular movement disorders, bowel/ urinary incontinence |                                              |
| <b>ALT1</b>    | Spastic paraplegia 3A, autosomal dominant                                 | 182600              | AD          | Early onset spasticity                                                                                                          |                                                                                               |                                                        |                                              |
| <b>AMPD2</b>   | Pontocerebellar hypoplasia, type 9                                        | 615809              | AR          | ID, spasticity, dystonia, microcephaly, seizures                                                                                | cerebellar hypoplasia/ atrophy                                                                |                                                        |                                              |
| <b>AP4B1</b>   | Autosomal recessive spastic paraplegia-47                                 | 614066              | AR          | neonatal hypotonia that progresses to hypertonia and spasticity and                                                             | Thin corpus callosum, periventricular white matter                                            |                                                        |                                              |

|               |                                              |        |         |                                                                                                                                                                                   |                                                                                                                       |                                                                    |
|---------------|----------------------------------------------|--------|---------|-----------------------------------------------------------------------------------------------------------------------------------------------------------------------------------|-----------------------------------------------------------------------------------------------------------------------|--------------------------------------------------------------------|
|               |                                              |        |         | severe mental retardation with poor or absent speech development                                                                                                                  | abnormalities, white matter loss, ventriculomegaly                                                                    |                                                                    |
| <b>AP4E1</b>  | Autosomal recessive spastic paraplegia-51    | 613744 | AR      | neonatal hypotonia that progresses to hypertonia and spasticity and severe mental retardation with poor or absent speech development                                              | Cortical atrophy, cerebellar atrophy, enlarged ventricles, diffuse white matter loss                                  |                                                                    |
| <b>AP4M1</b>  | Autosomal recessive spastic paraplegia-50    | 612936 | AR      | neonatal hypotonia that progresses to hypertonia and spasticity and severe mental retardation with poor or absent speech development                                              | Cerebellar atrophy, thin corpus callosum, ventriculomegaly, white matter lesions, decreased myelin, gliosis           |                                                                    |
| <b>AP4S1</b>  | Autosomal recessive spastic paraplegia-52    | 614067 | AR      | neurodevelopmental disorder characterized by neonatal hypotonia that progresses to hypertonia and spasticity and severe mental retardation with poor or absent speech development | Thin or absent corpus callosum                                                                                        |                                                                    |
| <b>ARG1</b>   | Argininemia                                  | 207800 | AR      | spastic paraplegia, epileptic seizures, and severe mental retardation, microcephaly                                                                                               |                                                                                                                       |                                                                    |
| <b>ARSA</b>   | Metachromatic leukodystrophy                 | 250100 | AR      | motor symptoms, rigidity, mental deterioration, and sometimes convulsions                                                                                                         | Demyelination                                                                                                         |                                                                    |
| <b>ARX</b>    | Epileptic encephalopathy, early infantile, 1 | 308350 | XLR     | infantile spasms with severe dyskinetic quadriparesis                                                                                                                             |                                                                                                                       |                                                                    |
| <b>ASPA</b>   | Canavan disease                              | 271900 | AR      | onset in early infancy, atonia of neck muscles, hypotonia, hyperextension of legs and flexion of arms, blindness, severe mental defect, megalencephaly                            | Demyelination and leukodystrophy                                                                                      |                                                                    |
| <b>ATAD3A</b> | Harel-Yoon syndrome                          | 618810 | AD      | developmental delay, hypotonia, spasticity, optic atrophy, axonal neuropathy, dyskinetic CP                                                                                       | Cerebellar atrophy                                                                                                    | Hypertrophic cardiomyopathy                                        |
| <b>ATL1</b>   | Autosomal dominant spastic paraplegia-3A     | 182600 | AD      | early onset spastic paraplegia                                                                                                                                                    |                                                                                                                       |                                                                    |
| <b>ATM</b>    | Ataxia-telangiectasia                        | 208900 | AR      | cerebellar ataxia, progressive neurologic degeneration                                                                                                                            | Cerebellar cortical degeneration                                                                                      | Telangiectases, immune defects, and a predisposition to malignancy |
| <b>ATP7B</b>  | Wilson disease                               | 277900 | AR      | Tremor, dysarthria, dystonia, dementia                                                                                                                                            | abnormalities of the basal ganglia in generalized cerebral atrophy, they also noted subtle white matter abnormalities | Kayser-Fleischer rings, liver cirrhosis, hepatomegaly              |
| <b>AUTS2</b>  | Autosomal dominant mental retardation-26     | 615834 | AD (DN) | intellectual disability, autism, microcephaly, cerebral palsy,                                                                                                                    |                                                                                                                       | Short stature, dysmorphisms                                        |

|                 |                                               |        |     |                                                                                                                                                                                              |                                                                                                                                                                           |                                                                                                  |
|-----------------|-----------------------------------------------|--------|-----|----------------------------------------------------------------------------------------------------------------------------------------------------------------------------------------------|---------------------------------------------------------------------------------------------------------------------------------------------------------------------------|--------------------------------------------------------------------------------------------------|
| <b>BCKDHA</b>   | Maple syrup urine disease                     | 248600 | AR  | progressive neurologic signs of altering hypotonia and hypertonia, reflecting a severe encephalopathy. Seizures and coma usually occur, followed by death if untreated                       | White matter signal abnormalities, diffusion abnormalities                                                                                                                |                                                                                                  |
| <b>BCKDHB</b>   | Maple syrup urine disease                     | 248600 | AR  | progressive neurologic signs of altering hypotonia and hypertonia, reflecting a severe encephalopathy. Seizures and coma usually occur, followed by death if untreated                       | White matter signal abnormalities, diffusion abnormalities                                                                                                                |                                                                                                  |
| <b>BSCL2</b>    | Silver spastic paraplegia syndrome            | 270685 | AD  | spastic paraparesis and severe amyotrophy of distal limb muscles                                                                                                                             |                                                                                                                                                                           |                                                                                                  |
| <b>BTB</b>      | biotinidase deficiency                        | 253260 | AR  | Symptoms usually appeared by about 3 months of age with seizures as the most frequent initial symptom. Hypotonia, ataxia.                                                                    | Diffuse cerebral and cerebellar atrophy                                                                                                                                   | hearing loss, optic atrophy, skin rash, alopecia                                                 |
| <b>C12ORF65</b> | Spastic paraplegia 55, autosomal recessive    | 615035 | AR  | reduced upper-extremity strength & dexterity, lower-extremity muscle atrophy, & motor sensory neuropathy                                                                                     |                                                                                                                                                                           | Reduced visual acuity (w/central scotoma & optic atrophy)                                        |
| <b>CACNA1A</b>  | Developmental and epileptic encephalopathy 42 | 617106 | AD  | ID, autism, ataxia, seizures                                                                                                                                                                 | Cerebellar atrophy                                                                                                                                                        | Nystagmus, abnormal eye movements                                                                |
| <b>CAMK4</b>    | NA                                            | NA     | AD  | Developmental delay, intellectual disability, autism, ataxia, and mixed hyperkinetic movement disorder including severe generalized dystonia                                                 | PMID: 30262571                                                                                                                                                            |                                                                                                  |
| <b>CDKL5</b>    | Early infantile epileptic encephalopathy-2    | 300672 | XLD | Severe global developmental delay resulting in ID and poor motor control. Seizures.                                                                                                          |                                                                                                                                                                           |                                                                                                  |
| <b>CEP290</b>   | Joubert syndrome 5                            | 610188 | AR  | psychomotor delay, hypotonia, ataxia, oculomotor apraxia, and neonatal breathing abnormalities                                                                                               | 'molar tooth sign' consisting of cerebellar vermis hypoplasia or aplasia, thick and maloriented superior cerebellar peduncles, and abnormally deep interpeduncular fossa. |                                                                                                  |
| <b>CLN3</b>     | Neuronal ceroid lipofuscinosis-3              | 204200 | AR  | seizures and gradual mental and motor dysfunction, myoclonus, parkinsonism, and a severe dysarthria, behavioral problems with angry outbursts, physical violence, and features of depression | Cerebral atrophy                                                                                                                                                          | gradual visual loss with macular degeneration, optic atrophy, and/or retinitis pigmentosa.       |
| <b>COL4A1</b>   | Porencephaly 1                                | 175780 | AD  | ID, seizures, spasticity, dystonia, migraine, hemiparesis                                                                                                                                    | Porencephaly, leukoencephalopathy, schizencephaly, carotid aneurysms, microbleeds, lacunar infarcts, parenchymal hemorrhage                                               | Ophthalmological abnormalities, renal abnormalities, cardiac arrhythmia, muscle cramps, myopathy |
| <b>COL4A2</b>   | Porencephaly 2                                | 614483 | AD  | Developmental delay, spasticity, hemiplegia, seizures                                                                                                                                        | Porencephaly, leukoencephalopathy, schizencephaly, parenchymal hemorrhage, carotid aneurysms                                                                              | Ophthalmological abnormalities                                                                   |

|                 |                                                                               |        |    |                                                                                                                                                                        |                                                                                                                                                                                          |                                                                |
|-----------------|-------------------------------------------------------------------------------|--------|----|------------------------------------------------------------------------------------------------------------------------------------------------------------------------|------------------------------------------------------------------------------------------------------------------------------------------------------------------------------------------|----------------------------------------------------------------|
| <b>COLGALT1</b> | Brain small vessel disease 3                                                  | 618360 | AR | Developmental delay, spastic quadriplegia, intellectual disability                                                                                                     | Cerebral hemorrhage, porencephaly, brain small vessel disease, intracranial calcifications                                                                                               |                                                                |
| <b>CTNNB1</b>   | Neurodevelopmental disorder with spastic diplegia and visual defects; NEDSDV  | 615075 | AD | ID, hypotonia, spastic paraplegia, microcephaly                                                                                                                        | Hypoplastic corpus callosum                                                                                                                                                              | Ophthalmological abnormalities, fair skin                      |
| <b>CYP2U1</b>   | Spastic paraplegia 56, autosomal recessive                                    | 615030 | AR | ID, spastic paraplegia, dystonia, neuropathy                                                                                                                           | White matter lesions, thin corpus callosum, calcifications globus pallidus                                                                                                               |                                                                |
| <b>CYP2U1</b>   | Spastic paraplegia 56, autosomal recessive                                    | 615030 | AR | Upper-extremity involvement, upper-extremity dystonia, ID, axonal neuropathy                                                                                           | thin corpus callosum, brain white-matter disturbance, basal ganglia calcifications                                                                                                       |                                                                |
| <b>CYP7B1</b>   | Spastic paraplegia 5A, autosomal recessive                                    | 270800 | AR | Axonal neuropathy, Distal or generalized muscle atrophy, spasticity                                                                                                    | White-matter abnormalities on MRI                                                                                                                                                        |                                                                |
| <b>DARS</b>     | Hypomyelination with brainstem and spinal cord involvement and leg spasticity | 615281 | AR | severe lower limb spasticity, nystagmus, hyperreflexia, and extensor plantar responses                                                                                 | extensive white matter abnormalities involving the supratentorial white matter, brainstem, cerebellar peduncles, and dorsal columns and lateral corticospinal tracts of the spinal cord. |                                                                |
| <b>DBT</b>      | maple syrup urine disease                                                     | 248600 | AR | progressive neurologic signs of altering hypotonia and hypertonia, reflecting a severe encephalopathy. Seizures and coma usually occur, followed by death if untreated | White matter signal abnormalities, diffusion abnormalities                                                                                                                               |                                                                |
| <b>DDC</b>      | Aromatic L-amino acid decarboxylase deficiency                                | 608643 | AR | vegetative symptoms, oculogyric crises, dystonia, and severe neurologic dysfunction, usually beginning in infancy or childhood                                         |                                                                                                                                                                                          | Temperature instabilities, sweating                            |
| <b>DDHD1</b>    | Spastic paraplegia 28, autosomal recessive                                    | 609340 | AR | early-onset, slowly progressive lower-limb spasticity resulting in walking difficulties. Cerebellar oculomotor disturbance. Axonal neuropathy.                         |                                                                                                                                                                                          | Scoliosis, pes cavus                                           |
| <b>DDHD2</b>    | Spastic paraplegia 54, autosomal recessive                                    | 615033 | AR | Psychomotor delay, ID, progressive spasticity (leading to foot contractures), Dysarthria, dysphagia, strabismus                                                        | thin corpus callosum, periventricular white-matter abnormalities                                                                                                                         | optic hypoplasia                                               |
| <b>DGUOK</b>    | Mitochondrial DNA depletion syndrome 3                                        | 251880 | AR | ID, spastic diplegia                                                                                                                                                   | Cerebral atrophy                                                                                                                                                                         | Failure to thrive, hepatomegaly, splenomegaly                  |
| <b>DHPR</b>     | BH4-deficient hyperphenylalaninemia                                           | 261630 | AR | progressive encephalopathy combining mental retardation, epilepsy, and pyramidal, cerebellar, and extrapyramidal signs                                                 | Intracerebral calcifications                                                                                                                                                             | Episodic hyperthermia                                          |
| <b>DLD</b>      | dihydrolipoamide dehydrogenase deficiency                                     | 246900 | AR | Microcephaly, hypotonia, dystonia, ataxia, seizures, episodic encephalopathy                                                                                           | subacute necrotizing encephalomyelopathy                                                                                                                                                 | optic atrophy, metabolic acidosis, hypertrophic cardiomyopathy |

|                |                                                 |        |         |                                                                                                                                                                                                         |                                                                                                                                    |                                                                                                                                       |                |
|----------------|-------------------------------------------------|--------|---------|---------------------------------------------------------------------------------------------------------------------------------------------------------------------------------------------------------|------------------------------------------------------------------------------------------------------------------------------------|---------------------------------------------------------------------------------------------------------------------------------------|----------------|
| <b>DYRK1A</b>  | Mental retardation, autosomal dominant 7        | 614104 | AD (DN) | ID, hypotonia, hypertonia, ataxia, abnormal gait, seizures, autistic features                                                                                                                           | Unspecific                                                                                                                         | Ophthalmological abnormalities, hearing loss                                                                                          |                |
| <b>EIF2B1</b>  | Leukoencephalopathy with vanishing white matter | 603896 | AR      | acute encephalopathy, spastic paraparesis, neurodegeneration, dementia                                                                                                                                  | diffuse cerebral hemispheric leukoencephalopathy                                                                                   |                                                                                                                                       |                |
| <b>EIF2B2</b>  | Leukoencephalopathy with vanishing white matter | 603896 | AR      | acute encephalopathy, spastic paraparesis, neurodegeneration, dementia                                                                                                                                  | diffuse cerebral hemispheric leukoencephalopathy                                                                                   |                                                                                                                                       |                |
| <b>EIF2B3</b>  | Leukoencephalopathy with vanishing white matter | 603896 | AR      | acute encephalopathy, spastic paraparesis, neurodegeneration, dementia                                                                                                                                  | diffuse cerebral hemispheric leukoencephalopathy                                                                                   |                                                                                                                                       |                |
| <b>EIF2B4</b>  | Leukoencephalopathy with vanishing white matter | 603896 | AR      | acute encephalopathy, spastic paraparesis, neurodegeneration, dementia                                                                                                                                  | diffuse cerebral hemispheric leukoencephalopathy                                                                                   |                                                                                                                                       |                |
| <b>EIF2B5</b>  | Leukoencephalopathy with vanishing white matter | 603896 | AR      | acute encephalopathy, spastic paraparesis, neurodegeneration, dementia                                                                                                                                  | diffuse cerebral hemispheric leukoencephalopathy                                                                                   |                                                                                                                                       |                |
| <b>ELP2</b>    | Autosomal recessive mental retardation-58       | 617270 | AR      | truncal hypotonia, lower limb spasticity with hyperreflexia, choreoathetosis, and stereotypical movements. Mild-severe ID. Agressive behaviour.                                                         | Normal                                                                                                                             |                                                                                                                                       |                |
| <b>EPT</b>     | Complex spastic paraplegia                      | NA     | AR      | Spastic paraplegia, cerebellar ataxia, dysarthria, nystagmus                                                                                                                                            | White matter abnormalities                                                                                                         | Mild retinal tortuosity, mild retinal pigment disturbance, short stature, microcephaly, high arched palate, cleft palate, bifid uvula | PMID: 29500230 |
| <b>ERLIN2</b>  | Spastic paraplegia 18, autosomal recessive      | 611225 | AR      | early-onset spasticity, mental retardation, epilepsy                                                                                                                                                    | Thin corpus callosum                                                                                                               |                                                                                                                                       |                |
| <b>F10</b>     | Factor X deficiency                             | 227600 | AR      | Intracranial hemorrhage                                                                                                                                                                                 |                                                                                                                                    | Epistaxis, hemarthrosis, bleeding diathesis                                                                                           |                |
| <b>FAM126A</b> | Hypomyelinating leukodystrophy-5                | 610532 | AR      | Truncal hypotonia, pyramidal signs, muscle weakness and wasting of the lower limbs associated with a peripheral motor neuropathy. Cerebellar signs. Mild mental retardation , seizures (in 1 patient).  | diffuse cerebral hypomyelination, whereas the cortex and deep gray matter structures were preserved.                               | congenital cataract                                                                                                                   |                |
| <b>FAM126A</b> | Leukodystrophy, hypomyelinating, 5              | 610532 | AR      | slowly progressive pyramidal and cerebellar dysfunction, muscle weakness and wasting prevailingly in the lower limbs, and most became wheelchair-bound. Mental deficiency ranged from mild to moderate. | diffuse cerebral hypomyelination, whereas the cortex and deep gray matter structures were preserved.                               | congenital cataract                                                                                                                   |                |
| <b>FBXO31</b>  | ND                                              | ND     | AD (DN) | Spastic-diplegic CP, ID, expressive language disorder, ADHD                                                                                                                                             | ventricular dilatation, thin corpus callosum                                                                                       | Strabism, constipation, cleft palate                                                                                                  | PMID: 32989326 |
| <b>FH</b>      | Fumarase deficiency                             | 606812 | AR      | Relative macrocephaly, failure to thrive, hypotonia, seizures, developmental delay                                                                                                                      | Polymicrogyria, angulation of the frontal horns, enlarged ventricles, decreased periventricular white matter, and small brainstem. | Optic nerve hypoplasia or pallor. Metabolic acidosis, necrotizing enterocolitis, liver failure. Frontal                               |                |

|               |                                                                                       |        |         |                                                                                                                                                                                                                                                                                                                                  |                                                                                                                                                  |                                                                                                                                              |
|---------------|---------------------------------------------------------------------------------------|--------|---------|----------------------------------------------------------------------------------------------------------------------------------------------------------------------------------------------------------------------------------------------------------------------------------------------------------------------------------|--------------------------------------------------------------------------------------------------------------------------------------------------|----------------------------------------------------------------------------------------------------------------------------------------------|
|               |                                                                                       |        |         |                                                                                                                                                                                                                                                                                                                                  |                                                                                                                                                  | bossing, hypertelorism, depressed nasal bridge, anteverted nares, and high-arched palate.                                                    |
| <b>FLVCR2</b> | Fowler syndrome/ Proliferative vasculopathy and hydranencephaly-hydrocephaly syndrome | 225790 | AR      | Joint contractures, severe developmental delay, fetal akinesia deformation sequence                                                                                                                                                                                                                                              | Hydranencephaly, diffuse ischemic lesions of the brain stem, basal ganglia, and spinal cord with calcifications                                  | Intrauterine growth retardation, glomeruloid vascular proliferation in the retina                                                            |
| <b>FOXC1</b>  | Anterior segment dysgenesis-3                                                         | 601631 | AD      | Cerebral small vessel disease                                                                                                                                                                                                                                                                                                    | White matter hyperintensities, dilated perivascular spaces, and lacunar infarction                                                               | Axenfeld-Rieger anomaly                                                                                                                      |
| <b>FOXG1</b>  | Congenital variant of Rett syndrome                                                   | 613454 | AD (DN) | severe postnatal microcephaly, severe mental retardation with absent language , deficient social reciprocity resembling autism, combined stereotypies, and dyskinesias, such as dystonia, chorea, and athetosis. The patients also developed epilepsy after age 3 months and showed poor sleep patterns, irritability in infancy | simplified gyral pattern and reduced white matter volume in the frontal lobes, corpus callosum hypogenesis, and variable mild frontal pachygyria | recurrent aspiration, and gastroesophageal reflux.                                                                                           |
| <b>GAD1</b>   | Autosomal recessive spastic cerebral palsy-1                                          | 603513 | AR      | Cerebral palsy, diplegia, quadriplegia, microcephaly, contractures                                                                                                                                                                                                                                                               |                                                                                                                                                  | Scoliosis                                                                                                                                    |
| <b>GALC</b>   | Krabbe disease                                                                        | 245200 | AR      | extreme irritability, spasticity, and developmental delay. There is severe motor and mental deterioration, leading to decerebration and death. Spastic paraparesis. Neuropathy.                                                                                                                                                  | Diffuse cerebral atrophy, demyelination, ventriculomegaly                                                                                        | Optic atrophy, blindness, deafness                                                                                                           |
| <b>GALT</b>   | galactosemia                                                                          | 230400 | AR      | Hypotonia, verbal dyspraxia, ID, motor abnormalities                                                                                                                                                                                                                                                                             |                                                                                                                                                  | jaundice, hepatosplenomegaly, hepatocellular insufficiency, food intolerance, hypoglycemia, renal tubular dysfunction, sepsis, and cataract. |
| <b>GAMT</b>   | Cerebral creatine deficiency syndrome 2                                               | 612736 | AR      | developmental delay/regression, mental retardation, severe disturbance of expressive and cognitive speech, intractable seizures and hypotonia, ataxia, extrapyramidal movement disturbances                                                                                                                                      | Myelination delay                                                                                                                                |                                                                                                                                              |
| <b>GBA</b>    | Gaucher disease type II                                                               | 230900 | AR      | rapid progression of neurologic disease with spasticity, rigidity, refractory seizures, and oculomotor abnormalities.                                                                                                                                                                                                            | Cerebral atrophy, brain stem degeneration                                                                                                        | Squint, oculomotor apraxia, hepatomegaly, splenomegaly, anemia, thrombocytopenia                                                             |
| <b>GCH1</b>   | Dystonia, DOPA-responsive, with or without hyperphenylalaninemia                      | 128230 | AR/ AD  | Dystonia, ataxia, hyperreflexia, parkinsonism, extrapyramidal signs, cerebellar signs                                                                                                                                                                                                                                            |                                                                                                                                                  | Scoliosis, pes cavus, torticollis                                                                                                            |

|                            |                                                                                      |                   |             |                                                                                                                                                                                                                                                                        |                                                                                                                |                                                                                                                      |
|----------------------------|--------------------------------------------------------------------------------------|-------------------|-------------|------------------------------------------------------------------------------------------------------------------------------------------------------------------------------------------------------------------------------------------------------------------------|----------------------------------------------------------------------------------------------------------------|----------------------------------------------------------------------------------------------------------------------|
| <b>GFAP</b>                | Alexander disease                                                                    | 203450            | AD          | seizures, megalencephaly/<br>macrocephaly, developmental<br>delay, and spasticity, ataxia, bulbar<br>or pseudobulbar symptoms.                                                                                                                                         | Cerebral white matter<br>abnormalities, preferentially<br>affecting the frontal region. Brain<br>stem atrophy. |                                                                                                                      |
| <b>GJA12</b>               | Hypomyelinating leukodystrophy-2                                                     | 608804            | AR          | Nystagmus, impaired motor<br>development, ataxia,<br>choreoathetotic movements,<br>dysarthria, and progressive<br>spasticity, neuropathy.                                                                                                                              | Characteristic diffuse T2-weighted<br>hyperintensities consistent with<br>hypomyelination.                     | Optic atrophy                                                                                                        |
| <b>GJC2</b>                | Spastic paraplegia 44, autosomal<br>recessive/ Leukodystrophy,<br>hypomyelinating, 2 | 613206/<br>608804 | AR          | ID, slowly progressive SPG,<br>dysarthria, & upper-extremity<br>involvement/ early-onset<br>dysmyelinating disorder<br>w/nystagmus, psychomotor delay,<br>progressive spasticity, ataxia                                                                               | Hypomyelinating<br>leukoencephalopathy                                                                         |                                                                                                                      |
| <b>GLB1</b>                | GM1-gangliosidosis                                                                   | 230500            | AR          | psychomotor deterioration,<br>seizures, dystonia or gait or speech<br>disturbance.                                                                                                                                                                                     |                                                                                                                | macular cherry-red spots,<br>skeletal dysplasia,<br>hepatosplenomegaly,<br>cardiomyopathy, coarse<br>facial features |
| <b>GLDC, AMT,<br/>GCSH</b> | Glycine encephalopathy/ nonketotic<br>hyperglycinemia                                | 605899            | AR          | lethargy, hypotonia, and myoclonic<br>jerks, and progressing to apnea,<br>intractable seizures, profound<br>mental retardation, chorea, and<br>vertical gaze palsy                                                                                                     |                                                                                                                |                                                                                                                      |
| <b>GLRA1</b>               | hyperekplexia-1                                                                      | 149400            | AR/ AD      | Exaggerated startle response,<br>infantile hypertonia and<br>hypokinesia, nocturnal myoclonus,<br>an easily elicited head retraction<br>reflex, apnea                                                                                                                  |                                                                                                                | Umbilical and inguinal<br>hernias                                                                                    |
| <b>GM2A</b>                | GM2-gangliosidosis, AB variant                                                       | 272750            | AR          | Abnormal behavior, including<br>increased anxiety and phobias,<br>spastic quadriparesis, limb dystonia,<br>pyramidal signs, and generalized<br>chorea. The hyperkinetic disorder<br>gradually gives way to a rigid<br>akinetic state. Exaggerated startle<br>response. | Cerebral atrophy,                                                                                              | Cherry-red macular spots                                                                                             |
| <b>GNAO1</b>               | Neurodevelopmental disorder with<br>involuntary movements                            | 617493            | AD          | Developmental delay, hypotonia,<br>dystonic/ hyperkinetic CP, chorea                                                                                                                                                                                                   | Cerebral atrophy, thin corpus<br>callosum                                                                      |                                                                                                                      |
| <b>GNB1</b>                | Mental retardation, autosomal<br>dominant 42                                         | 616973            | AD          | ID, hypotonia, spasticity, dyskinesia,<br>ADHD, ASS, seizures                                                                                                                                                                                                          | Mostly normal. 1 case<br>polymicrogyria                                                                        |                                                                                                                      |
| <b>GRID2</b>               | Spinocerebellar ataxia, autosomal<br>recessive 18                                    |                   | AR/ AD (DN) | nystagmus, hypotonia, delayed<br>psychomotor development,<br>incoordination of gross motor<br>movements, ataxia, dysarthria,<br>nystagmus, pyramidal tract<br>involvement.                                                                                             | Cerebral and cerebellar atrophy                                                                                |                                                                                                                      |
| <b>GRIN1</b>               | Neurodevelopmental disorder with or<br>without hyperkinetic movements and            | 617820            | AR/ AD (DN) | Profound developmental delay, ID,<br>hypotonia, spasticity, dyskinesia,<br>chorea, seizures                                                                                                                                                                            | Thin corpus callosum, cerebral<br>atrophy, polymicrogyria                                                      | Feeding difficulties, poor<br>visual contact                                                                         |

|                           |                                                                                       |        |                                                           |                                                                                                                                                                 |                                                                                                         |                                                                                                                                                       |
|---------------------------|---------------------------------------------------------------------------------------|--------|-----------------------------------------------------------|-----------------------------------------------------------------------------------------------------------------------------------------------------------------|---------------------------------------------------------------------------------------------------------|-------------------------------------------------------------------------------------------------------------------------------------------------------|
|                           | seizures, autosomal recessive/<br>dominant                                            |        |                                                           |                                                                                                                                                                 |                                                                                                         |                                                                                                                                                       |
| <b>GRIN2B</b>             | Mental retardation, autosomal<br>dominant 6                                           | 613970 | AD (DN)                                                   | Developmental delay, ID, seizures,<br>spasticity, dystonia, dyskinesias,<br>choreiform movements                                                                | Malformations of cortical<br>development (some patients)                                                |                                                                                                                                                       |
| <b>HESX1</b>              | Septooptic dysplasia                                                                  | 182230 | AR/ AD                                                    | Seizures, developmental delay, and<br>cerebral palsy                                                                                                            | absence of the corpus callosum<br>and septum pellucidum                                                 | optic nerve hypoplasia,<br>pituitary gland hypoplasia,<br>hypopituitarism                                                                             |
| <b>HEXA</b>               | Tay-Sachs disease/ GM2-<br>gangliosidosis, several forms                              | 272800 | AR                                                        | muscle atrophy beginning distally,<br>pes cavus, foot drop, spasticity, mild<br>ataxia of limbs and trunk, dystonia,<br>and dysarthria, dementia,<br>neuropathy | Leukoencephalopathy                                                                                     | Cherry red spot, blindness                                                                                                                            |
| <b>HIKESHI</b>            | Leukodystrophy, hypomyelinating, 13                                                   | 616881 | AR                                                        | infantile onset of delayed<br>psychomotor development, axial<br>hypotonia, and spasticity                                                                       | delayed myelination and<br>periventricular white matter<br>abnormalities                                |                                                                                                                                                       |
| <b>HPRT1</b>              | Lesch-Nyhan syndrome                                                                  | 300322 | XLR                                                       | mental retardation, spastic cerebral<br>palsy, choreoathetosis, dystonia,<br>self-destructive biting of fingers and<br>lips                                     |                                                                                                         | uric acid urinary stones,<br>gout, (megaloblastic)<br>anemia                                                                                          |
| <b>HSPD1</b>              | Leukodystrophy, hypomyelinating, 4                                                    | 612233 | AR                                                        | Hypotonia, nystagmus, and<br>psychomotor developmental delay,<br>followed by appearance of<br>prominent spasticity,<br>developmental arrest, and<br>regression. | thin corpus callosum and various<br>degrees of ventricular enlargement,<br>no myelination               |                                                                                                                                                       |
| <b>IFIH1</b>              | Aicardi-Goutieres syndrome 7                                                          | 615846 | AD                                                        | delayed psychomotor development,<br>axial hypotonia, spasticity,<br>microcephaly, spastic-dystonic<br>tetraparesis, and lack of speech.                         | basal ganglia calcification, cerebral<br>atrophy, and deep white matter<br>abnormalities.               | vasculitic rash,<br>lymphadenopathy,<br>serositis with pericardial<br>effusion, and abnormal<br>serum autoantibodies,<br>acute nephrotic<br>syndrome. |
| <b>ISG15</b>              | immunodeficiency-38 with basal<br>ganglia calcifications                              | 616126 | AR                                                        |                                                                                                                                                                 | Cerebral calcifications                                                                                 | Susceptibility to<br>mycobacterial<br>disease, lymphadenopathy                                                                                        |
| <b>ITPR1</b>              | spinocerebellar ataxia-29                                                             | 117360 | AD                                                        | delayed motor development and<br>mild cognitive delay, gait and limb<br>ataxia, nystagmus, dysarthria, and<br>tremor                                            | Cerebellar (vermis) atrophy                                                                             |                                                                                                                                                       |
| <b>JAM3</b>               | Hemorrhagic destruction of the brain,<br>subependymal calcification, and<br>cataracts | 613730 | AR                                                        | Profound developmental delay,<br>spasticity, seizures                                                                                                           | Intraparenchymal brain<br>hemorrhage, ventriculomegaly,<br>porencephaly, subependymal<br>calcifications |                                                                                                                                                       |
| <b>KANK1/<br/>ANKRD15</b> | Cerebral palsy, spastic quadriplegic, 2                                               | 612900 | (deletions<br>inherited<br>from<br>unaffected<br>fathers) | Congenital hypotonia, spastic<br>quadriplegia, nystagmus, mental<br>retardation.                                                                                | brain atrophy and<br>ventriculomegaly.                                                                  |                                                                                                                                                       |



|                  |                                                                     |        |                                           |                                                                                                                                                                                               |                                                                                                                                               |                                         |
|------------------|---------------------------------------------------------------------|--------|-------------------------------------------|-----------------------------------------------------------------------------------------------------------------------------------------------------------------------------------------------|-----------------------------------------------------------------------------------------------------------------------------------------------|-----------------------------------------|
| <b>KCNC3</b>     | Spinocerebellar ataxia 13                                           | 605259 | AD                                        | childhood-onset cerebellar gait ataxia associated with cerebellar dysarthria, moderate mental retardation, and mild developmental delay in motor acquisition. Nystagmus and pyramidal signs   | Moderate cerebellar and pontine atrophy                                                                                                       |                                         |
| <b>KCNQ2</b>     | Epileptic encephalopathy, early infantile, 7                        | 613720 | AD                                        | ID, dystonic CP, spastic quadriplegia                                                                                                                                                         | Hyperintensities in the basal ganglia and/or thalamus, thin corpus callosum, reduced posterior white matter volume                            |                                         |
| <b>KDM5C</b>     | Mental retardation, X-linked, syndromic, Claes-Jensen type          | 300534 | XLR                                       | evere mental retardation, slowly progressive spastic paraplegia, facial hypotonia, aggressive behavior and strabismus, seizures, microcephaly                                                 |                                                                                                                                               | Short stature, dysmorphisms             |
| <b>KIDINS220</b> | Spastic paraplegia, intellectual disability, nystagmus, and obesity | 617296 | AD (nonsense de novo that escape NMD)/ AR | ID, spastic paraplegia, macrocephaly                                                                                                                                                          | ventricular dilatation, cerebral atrophy, delayed myelination                                                                                 | Obesity, nystagmus                      |
| <b>KIF1A</b>     | Spastic paraplegia 30, autosomal recessive                          | 610357 | AR                                        | unsteady spastic gait and hyperreflexia of the lower limbs. Mildly impaired sensation and cerebellar involvement. Axonal sensorimotor peripheral neuropathy. Normal cognition.                | Mild cerebellar atrophy                                                                                                                       |                                         |
| <b>KIF1C</b>     | Spastic ataxia 2, autosomal recessive                               | 611302 | AR                                        | Spasticity, ataxia                                                                                                                                                                            | Normal                                                                                                                                        |                                         |
| <b>KIF5A</b>     | Spastic paraplegia 10, autosomal dominant                           | 604187 | AD                                        | lower limb spasticity, hyperreflexia, and weakness, leading to impaired gait, mild upper limb hyperreflexia, pes cavus, axonal sensorimotor peripheral neuropathy, distal sensory impairment. |                                                                                                                                               |                                         |
| <b>L1CAM</b>     | Hydrocephalus due to aqueductal stenosis/ MASA syndrome             | 307000 | XLR                                       | mental retardation, and often includes spastic paraparesis and adducted thumbs                                                                                                                | Hydrocephalus, aqueductal stenosis, agenesis of corpus callosum                                                                               | Hypoplasia and contracture of the thumb |
| <b>L1CAM</b>     | MASA syndrome                                                       | 303350 | XLR                                       | Hydrocephalus, aphasia, & adducted thumbs variably present                                                                                                                                    |                                                                                                                                               |                                         |
| <b>L2HGDH</b>    | L-2-hydroxyglutaric aciduria                                        | 236792 | AR                                        | Macrocephaly, spastic tetraparesis, dystonia, extrapyramidal signs, seizures, regression                                                                                                      | subcortical leukoencephalopathy, cerebellar atrophy, and signal changes in the putamina and dentate nuclei, demyelinated with cystic cavities | hearing loss, optic atrophy, strabism   |
| <b>LAMA2</b>     | Merosin-deficient congenital muscular dystrophy type 1A             | 607855 | AR                                        | hypotonia, poor suck and cry, and delayed motor development, areflexia. Mental retardation and/or seizures occur only rarely                                                                  | Periventricular white matter abnormalities, abnormal cortical gyration (polymicrogyria)                                                       |                                         |

|                                   |                                                   |                   |          |                                                                                                                                                                                                                                  |                                                                                                                                                                                                                            |                                                                                                                                                                 |
|-----------------------------------|---------------------------------------------------|-------------------|----------|----------------------------------------------------------------------------------------------------------------------------------------------------------------------------------------------------------------------------------|----------------------------------------------------------------------------------------------------------------------------------------------------------------------------------------------------------------------------|-----------------------------------------------------------------------------------------------------------------------------------------------------------------|
| <b>LIS1</b>                       | lissencephaly-1 / Subcortical laminar heterotopia | 607432            | AD (DN)  | Hypotonia, spastic quadripareses, seizures, severe developmental delay                                                                                                                                                           | Agyria, pachygyria, subcortical band heterotopia, Corpus callosum abnormalities, cerebellar hypoplasia, brainstem hypoplasia, enlarged ventricles, White matter abnormalities, prominent perivascular spaces.              |                                                                                                                                                                 |
| <b>MARS2</b>                      | Spastic ataxia 3, autosomal recessive             | 611390            | AR       | spastic ataxia and brain white matter changes                                                                                                                                                                                    | Cerebral and cerebellar atrophy                                                                                                                                                                                            |                                                                                                                                                                 |
| <b>MCPH1</b>                      | Primary microcephaly-1                            | 251200            | AR       | Seizures, developmental delay, microcephaly                                                                                                                                                                                      |                                                                                                                                                                                                                            | Short stature                                                                                                                                                   |
| <b>MECP2</b>                      | Rett syndrome/Encephalopathy, neonatal severe     | 312750/<br>300673 | XLD/ XLR | deterioration progressed to severe dementia, autism, loss of purposeful use of the hands, jerky truncal ataxia, and 'acquired' microcephaly, mainly spastic paraparesis, vasomotor disturbances of the lower limbs, and epilepsy | Cortical atrophy (frontal area)                                                                                                                                                                                            | Hyperventilation, apnea, scoliosis, cold feet                                                                                                                   |
| <b>MOCS1/<br/>MOCS2/<br/>GPHN</b> | Molybdenum cofactor deficiency                    | 252150            | AR       | seizures (72%), feeding difficulties (25%) and hypotonia (11%), developmental delay (9%), hemiplegia (2%), lens dislocation (2%), and hyperreflexia                                                                              | brain atrophy, neuronal loss, astrocytic gliosis, cystic changes in the subcortical white matter, thin corpus callosum, enlarged ventricles, and demyelination                                                             | dysmorphic facial features, including long face with puffy cheeks, widely spaced eyes, elongated palpebral fissures, thick lips, long philtrum, and small nose. |
| <b>MRPS25</b>                     | Combined oxidative phosphorylation deficiency 50  | 619025            | AR       | Dyskinetic cerebral palsy, myopathy, developmental delay                                                                                                                                                                         | Partial agenesis of corpus callosum                                                                                                                                                                                        | Short stature, adrenal insufficiency                                                                                                                            |
| <b>MTHFR</b>                      | Homocystinuria due to MTHFR deficiency            | 236250            | AR       | poor sucking, hypotonia, microcephaly, and lethargy in the newborn period, microcephaly, fits of apnea, seizures, and coma, gait abnormalities, psychiatric illness                                                              | Cerebral atrophy, abnormal gyral pattern, diffuse white matter hyperintensities, hypoplasia of the cerebellum and brainstem, and thinning of the corpus callosum                                                           |                                                                                                                                                                 |
| <b>MTOR</b>                       | Smith-Kingsmore syndrome                          | 616638            | AD       | Macrocephaly, ID, seizures, hypotonia                                                                                                                                                                                            | Mild prominence of the ventricular system, corpus callosum hypoplasia, generalized white matter loss, small mesencephalon, pons and medulla, perisylvian polymicrogyria, heterotopic gray matter in the right frontal lobe | Facial dysmorphisms, curly hair, cafe-au-lait spots, macrosomia, rhizomelic limb shortening, thrombocytopenia                                                   |
| <b>MTPAP</b>                      | Spastic ataxia 4, autosomal recessive             | 613672            | AR       | early childhood onset of a slowly progressive neurodegenerative disorder characterized primarily by cerebellar ataxia, spastic paraparesis, dysarthria, and optic atrophy                                                        |                                                                                                                                                                                                                            |                                                                                                                                                                 |
| <b>MTTP</b>                       | Abetalipoproteinemia                              | 200100            | AR       | Neuropathy, ataxia                                                                                                                                                                                                               | Demyelination                                                                                                                                                                                                              | retinal degeneration, coagulopathy, hepatic steatosis. Acanthocytosis                                                                                           |
| <b>MUT</b>                        | Methylmalonic aciduria, mut(0) type               | 251000            | AR       | lethargy, hypotonia, developmental delay, coma, strokes                                                                                                                                                                          | Basal ganglia ischemic stroke, cerebellar hemorrhage, globus                                                                                                                                                               | Failure to thrive, recurrent vomiting, dehydration, respiratory distress,                                                                                       |

|               |                                                                                              |        |                               |                                                                                                                                                                                                                                                                   |                                                                                                                                                                      |                                                                                                                                                                                   |
|---------------|----------------------------------------------------------------------------------------------|--------|-------------------------------|-------------------------------------------------------------------------------------------------------------------------------------------------------------------------------------------------------------------------------------------------------------------|----------------------------------------------------------------------------------------------------------------------------------------------------------------------|-----------------------------------------------------------------------------------------------------------------------------------------------------------------------------------|
|               |                                                                                              |        |                               |                                                                                                                                                                                                                                                                   | pallidus involvement, myelination delay                                                                                                                              | hepatomegaly, renal insufficiency, chronic pancreatitis, anemia, and optic atrophy, cardiomyopathy.                                                                               |
| <b>NIPA1</b>  | Spastic paraplegia 6, autosomal dominant                                                     | 600363 | AD                            | hyperreflexia and spasticity in the lower limbs, weakness of hip flexion and ankle dorsiflexion, extensor plantar responses, diminished vibratory sense in the feet, and pes cavus. Muscle atrophy. Seizures, postural tremor.                                    |                                                                                                                                                                      | Mild bladder disturbances                                                                                                                                                         |
| <b>NKX2.1</b> | Choreoathetosis, hypothyroidism, and neonatal respiratory distress/Chorea, hereditary benign | 610978 | AD                            | Movement abnormalities begin with muscular hypotonia followed by the development of chorea, athetosis, dystonia, ataxia, and dysarthria. Developmental delay in some.                                                                                             |                                                                                                                                                                      | neonatal respiratory distress. Hypothyroidism, congenital. Hypoplasia of the thyroid gland in some patients                                                                       |
| <b>NKX6.2</b> | Spastic ataxia 8, autosomal recessive, with hypomyelinating leukodystrophy                   | 617560 | AR                            | Delayed motor development, neonatal hypotonia, cerebellar ataxia, pyramidal tract signs, dystonia, peripheral neuropathy                                                                                                                                          | Cerebellar atrophy and hypomyelinating leukodystrophy                                                                                                                |                                                                                                                                                                                   |
| <b>NOTCH3</b> | recessive early-onset arteriopathy and cavitating leukoencephalopathy                        | NA     | AR (homozygous null-mutation) | childhood-onset arteriopathy                                                                                                                                                                                                                                      | Cavitating leukoencephalopathy with cerebral white matter abnormalities presented as diffuse cavitations, multiple lacunar infarctions and disseminated microbleeds. | PMID: 25870235                                                                                                                                                                    |
| <b>NOTCH3</b> | CADASIL                                                                                      | 125310 | AD                            | Strokes, dementia, seizures, migraine, gait disturbances, psychiatric disturbances                                                                                                                                                                                | Lacunar infarcts, microbleeds, leukoencephalopathy, subcortical lacunar lesions                                                                                      |                                                                                                                                                                                   |
| <b>NPC1</b>   | Niemann Pick C                                                                               |        | AR                            | neurologic abnormalities: ataxia, grand mal seizures, and loss of previously learned speech. Spasticity is striking and seizures, particularly myoclonic jerks, are common. Dystonia, vertical supranuclear gaze palsy, dementia, and psychiatric manifestations. | Neuronal loss, particularly of cerebellar Purkinje cells                                                                                                             | Hepatosplenomegaly, cholestasis. Foamy Niemann-Pick cells and 'sea-blue' histiocytes with distinctive histochemical and ultrastructural appearances are found in the bone marrow. |
| <b>NPC2</b>   | Niemann Pick C                                                                               | 607625 | AR                            | vertical supranuclear gaze paresis, dysarthria, and cognitive decline , expressive aphasia, ataxia and athetoid movements, facial dyskinesias and bradykinesia.                                                                                                   |                                                                                                                                                                      | Respiratory failure, Foam cells on bone marrow biopsy - 'Sea-blue' histiocytes                                                                                                    |
| <b>NPHP1</b>  | Joubert                                                                                      | 609583 | AR                            | gross motor delay, mild cognitive impairment, hypotonia, congenital head tilt, abnormal eye movements consistent with oculomotor apraxia,                                                                                                                         | hypoplasia of the cerebellar vermis and the 'molar tooth sign                                                                                                        | nephronophthisis                                                                                                                                                                  |
| <b>NT5C2</b>  | Spastic paraplegia 45, autosomal recessive                                                   | 613162 | AR                            | Spastic paraplegia, ID, ASS, ADHD                                                                                                                                                                                                                                 | White matter abnormalities, thin/dysplastic corpus callosum                                                                                                          | Pes equinovarus                                                                                                                                                                   |
| <b>PAK3</b>   | Mental retardation, X-linked 30/47                                                           | 300558 | XLR                           | microcephaly, marked hypotonia, and oromotor dysfunction with drooling and speech                                                                                                                                                                                 |                                                                                                                                                                      |                                                                                                                                                                                   |

|               |                                                               |        |                      |                                                                                                                                                    |                                                                                                                                                                                    |                                                                                                              |
|---------------|---------------------------------------------------------------|--------|----------------------|----------------------------------------------------------------------------------------------------------------------------------------------------|------------------------------------------------------------------------------------------------------------------------------------------------------------------------------------|--------------------------------------------------------------------------------------------------------------|
|               |                                                               |        |                      | difficulties. Behavioral features, including aggression, hyperactivity, and agitation. Epilepsy                                                    |                                                                                                                                                                                    |                                                                                                              |
| <b>PANK2</b>  | Neurodegeneration with brain iron accumulation 1              | 234200 | AR                   | Developmental delay, extrapyramidal syndrome, spasticity, cognitive decline                                                                        | Decreased signal intensity in pallidal nuclei with central hyperintensity, brain atrophy                                                                                           | Ophthalmological abnormalities, feeding difficulties                                                         |
| <b>PCCA</b>   | Propionicacidemia                                             | 606054 | AR                   | lethargy and ketosis, developmental retardation                                                                                                    | Cerebral atrophy, cerebellar hemorrhage                                                                                                                                            | hyperglycinemia, ketoacidosis, neutropenia, and thrombocytopenia, episodic vomiting, intolerance to protein. |
| <b>PCCB</b>   | Propionicacidemia                                             | 606054 | AR                   | lethargy and ketosis, developmental retardation                                                                                                    | Cerebral atrophy, cerebellar hemorrhage                                                                                                                                            | hyperglycinemia, ketoacidosis, neutropenia, and thrombocytopenia, episodic vomiting, intolerance to protein. |
| <b>PCYT2</b>  | Spastic paraplegia 82, autosomal recessive                    | 618770 | AR                   | Spastic paraplegia, cerebellar ataxia, dysarthria, nystagmus                                                                                       | Progressive cortical atrophy, thinning of cc and white matter abnormalities                                                                                                        | Mild growth retardation, growth hormone deficiency                                                           |
| <b>PDHA1</b>  | Pyruvate dehydrogenase E1-alpha deficiency                    | 312170 | XLD                  | Hypotonia, lethargy, seizures, mental retardation, spasticity, ataxia, choreoathetosis                                                             | Cerebral atrophy, Cystic lesions in the basal ganglia, brainstem, and cerebral hemispheres similar to Leigh syndrome (256000), agenesis of corpus callosum, ventricular dilatation | Minimal metabolic abnormalities possible                                                                     |
| <b>PDHX</b>   | Lacticacidemia due to PDX1 deficiency                         | 245349 | AR                   | Seizures, static cerebral palsy-like encephalopathy with spasticity and severe to profound mental retardation                                      |                                                                                                                                                                                    | Lactic acidosis crisis in first days/ months                                                                 |
| <b>PGN</b>    | spastic paraplegia-7                                          | 607259 | AR (sporadically AD) | lower limb spasticity, pyramidal signs, lower limb hyperreflexia, supranuclear palsy, nystagmus, and cerebellar dysarthria                         | Cortical and cerebellar atrophy                                                                                                                                                    | Optic atrophy, nystagmus, scoliosis                                                                          |
| <b>PHYH</b>   | Refsum disease                                                | 266500 | AR                   | retinitis pigmentosa, peripheral neuropathy, cerebellar ataxia, and elevated protein levels in the cerebrospinal fluid                             |                                                                                                                                                                                    | Cardiomyopathy, ichthyosis, hearing loss                                                                     |
| <b>PIK3CA</b> | Megalencephaly-capillary malformation-polymicrogyria syndrome | 602501 | AD-DN/ mosaicism     | primary megalencephaly, ID                                                                                                                         | Cortical malformations, polymicrogyria, ventriculomegaly, brain asymmetry                                                                                                          | Overgrowth, asymmetry, cutaneous vascular lesions, syndactyly, polydactyly, connective tissue dysplasia      |
| <b>PLA2G6</b> | Infantile neuroaxonal dystrophy 1                             | 256600 | AR                   | hypotonia, severe developmental delay with mental retardation, motor regression, and no eye contact. Tetraparesis, extrapyramidal symptoms, ataxia | Cerebral atrophy, cerebellar atrophy with signal hyperintensity in the cerebellar cortex seen on T2-weighted MRI, increased iron deposition in the basal ganglia                   |                                                                                                              |

|                    |                                                                                                      |        |     |                                                                                                                                                                                             |                                                                                                                                                                                                                    |                                                                                                                                                   |
|--------------------|------------------------------------------------------------------------------------------------------|--------|-----|---------------------------------------------------------------------------------------------------------------------------------------------------------------------------------------------|--------------------------------------------------------------------------------------------------------------------------------------------------------------------------------------------------------------------|---------------------------------------------------------------------------------------------------------------------------------------------------|
| <b>PLAA</b>        | Neurodevelopmental disorder with progressive microcephaly, spasticity, and brain anomalies           | 617527 | AR  | infantile onset of progressive microcephaly and spasticity and severe global developmental delay resulting in profound mental retardation and severely impaired or absent motor function.   | myelinating abnormalities and white matter lesions consistent with a leukoencephalopathy, as well as structural anomalies, including thin corpus callosum, gyral abnormalities, and cerebral or cerebellar atrophy |                                                                                                                                                   |
| <b>PLP1</b>        | Pelizaeus-Merzbacher disease                                                                         | 312080 | XLR | nystagmoid eye movement and jerking, rolling head movements or head tremor. Nystagmus disappears and ataxia, spasticity, and involuntary movements become manifest, as well as microcephaly | Dysmyelination, abnormal white matter signals                                                                                                                                                                      | Optic atrophy                                                                                                                                     |
| <b>PMM2</b>        | congenital disorder of glycosylation type Ia                                                         | 212065 | AR  | axial hypotonia, abnormal eye movement, psychomotor retardation, peripheral neuropathy, ataxia, seizures, stroke-like episodes                                                              | Olivopontocerebellar hypoplasia                                                                                                                                                                                    | retinitis pigmentosa, abnormal distribution of subcutaneous fat, nipple retraction, hypogonadism, infections, liver insufficiency, cardiomyopathy |
| <b>PNP</b>         | Immunodeficiency due to purine nucleoside phosphorylase deficiency                                   | 613179 | AR  | Spastic diplegia, tetrapareses, PMR, ataxia, tremor, hypotonia, hypertonia                                                                                                                  | Cerebral vasculitis                                                                                                                                                                                                | Immunodeficiency                                                                                                                                  |
| <b>POLG1</b>       | Mitochondrial DNA depletion syndrome 4A (Alpers type)                                                | 203700 | AR  | psychomotor retardation, intractable epilepsy, hypotonia, hypertonia, ataxia, dementia                                                                                                      | Progressive brain atrophy, cerebellar atrophy, gliosis                                                                                                                                                             | Liver failure                                                                                                                                     |
| <b>POLR1C</b>      | Leukodystrophy, hypomyelinating, 11                                                                  | 616494 | AR  | delayed psychomotor development, loss or lack of independent ambulation, abnormal cognition, tremor, ataxia, spasticity, and cerebellar findings                                            | hypomyelination and thin corpus callosum                                                                                                                                                                           | hypogonadotropic hypogonadism                                                                                                                     |
| <b>POLR3A</b>      | Leukodystrophy, hypomyelinating, 7, with or without oligodontia and/or hypogonadotropic hypogonadism | 607694 | AR  | neurodegenerative disorder, childhood onset of progressive motor decline manifest as spasticity, ataxia, tremor, and cerebellar signs, as well as mild cognitive regression.                | Leukodystrophy, hypomyelination, thinning of corpus callosum, cortical and cerebellar atrophy                                                                                                                      | hypodontia or oligodontia and hypogonadotropic hypogonadism                                                                                       |
| <b>POLR3B</b>      | Leukodystrophy, hypomyelinating, 8, with or without oligodontia and/or hypogonadotropic hypogonadism | 614381 | AR  | early childhood onset of cerebellar ataxia and mild intellectual disabilities                                                                                                               | high-intensity areas in the white matter on T2-weighted images, consistent with diffuse cerebral hypomyelination, as well as cerebellar atrophy, and hypoplastic corpus callosum.                                  | hypogonadotropic hypogonadism                                                                                                                     |
| <b>PPT1 (CLN1)</b> | neuronal ceroid lipofuscinosis-1                                                                     | 256730 | AR  | Mental retardation, loss of speech, minor motor seizures, regression of motor development, and ataxia.                                                                                      | Cerebral atrophy, progressive, hypointensities of the thalami, high signal of the white matter later on MRI                                                                                                        | optic atrophy and macular and retinal changes                                                                                                     |
| <b>PYCR2</b>       | Leukodystrophy, hypomyelinating, 10                                                                  | 616420 | AR  | progressive microcephaly, severely delayed psychomotor development, truncal hypotonia, appendicular hypertonia, hyperreflexia, and severe muscle wasting                                    | hypomyelination, decreased white matter volume, and thin corpus callosum and brainstem                                                                                                                             |                                                                                                                                                   |

|                 |                                                   |        |         |                                                                                                                                                                           |                                                                                                                                                 |                                                                           |
|-----------------|---------------------------------------------------|--------|---------|---------------------------------------------------------------------------------------------------------------------------------------------------------------------------|-------------------------------------------------------------------------------------------------------------------------------------------------|---------------------------------------------------------------------------|
| <b>RARS</b>     | Leukodystrophy, hypomyelinating, 9                | 616140 | AR      | delayed psychomotor development, spasticity, and nystagmus in the first year of life. Additional neurologic features such as ataxia and abnormal movements may also occur | diffuse hypomyelination affecting all regions of the brain                                                                                      |                                                                           |
| <b>REEP1</b>    | Spastic paraplegia 31, autosomal dominant         | 610250 | AD      | spastic paraplegia mainly characterized by proximal weakness of the lower extremities with brisk reflexes and spastic gait abnormalities, onset in childhood possible     |                                                                                                                                                 | Urinary urgency                                                           |
| <b>RHOB</b>     | ND                                                | ND     | AD (DN) | Spastic-dystonic CP                                                                                                                                                       |                                                                                                                                                 | PMID: 32989326                                                            |
| <b>RNASEH2A</b> | Aicardi-Goutieres syndrome 4                      | 606034 | AR      | Developmental delay, spasticity, seizures                                                                                                                                 | Ventricular dilatation, leukodystrophy, cerebral atrophy, brain stem atrophy, calcifications                                                    | Hepatomegaly, splenomegaly, poor feeding                                  |
| <b>RNASEH2B</b> | Aicardi-Goutieres syndrome-2                      | 610181 | AR      | Neurological dysfunction, progressive, spastic paraplegia, encephalopathy, dystonia                                                                                       | Intracranial calcifications                                                                                                                     |                                                                           |
| <b>RNASEH2C</b> | Aicardi-Goutieres syndrome 3                      | 610329 | AR      | Developmental delay, hyperreflexia, encephalopathy                                                                                                                        | Delayed myelination, white matter abnormalities, thin corpus callosum, intracranial calcifications                                              | Chilblains, ophthalmological findings                                     |
| <b>RNASET2</b>  | cystic leukoencephalopathy without megalencephaly | 612951 | AR      | Seizures, spasticity, athetosis, ID, ataxia, dystonia                                                                                                                     | Brain MRI showed extensive cysts within the anterior temporal lobes, ventricular enlargement, and white matter disease, cerebral calcifications | Hearing loss, nystagmus                                                   |
| <b>RTN2</b>     | spastic paraplegia-12                             | 604805 | AD      | Lower limb spasticity and hyperreflexia, early onset (1e decade)                                                                                                          |                                                                                                                                                 | Urinary incontinence                                                      |
| <b>SACS</b>     | Spastic ataxia, Charlevoix-Saguenay type          | 270550 | AR      | cerebellar ataxia, pyramidal tract signs, and peripheral neuropathy                                                                                                       | Cerebellar vermis atrophy                                                                                                                       | Swan-neck deformity of the fingers                                        |
| <b>SAMHD1</b>   | Aicardi-Goutieres syndrome-5                      | 612952 | AR      | Developmental delay, hypotonia, spasticity                                                                                                                                | Leukoencephalopathy, intracerebral calcifications, cerebrovascular abnormalities                                                                | Chilblains, skin problems, feeding difficulties, mouth ulcers             |
| <b>SCN8A</b>    | infantile epileptic encephalopathy-13             | 614558 | AD      | ID, seizures, regression                                                                                                                                                  | Cerebral atrophy                                                                                                                                |                                                                           |
| <b>SEPSECS</b>  | Pontocerebellar hypoplasia type 2D                | 613811 | AR      | ID, seizures, spastic quadriplegia, progressive                                                                                                                           | Cerebral atrophy, cerebellar atrophy, white matter abnormalities, thin corpus callosum                                                          |                                                                           |
| <b>SHH</b>      | holoprosencephaly-3                               | 142945 | AD      | Developmental delay, ID, motor disorder                                                                                                                                   | Holoprosencephaly, dilated ventricles                                                                                                           | Microcephaly, facial dysmorphisms, cleft lip/palate, ocular abnormalities |
| <b>SIX3</b>     | Holoprosencephaly 2                               | 157170 | AD      | Developmental delay, ID, seizures, hypotonia                                                                                                                              | Holoprosencephaly, corpus callosum agenesis, cerebellar hypoplasia                                                                              | Microcephaly, facial dysmorphisms, cleft lip/palate, ocular abnormalities |
| <b>SLC16A2</b>  | Allan-Herndon-Dudley syndrome                     | 300523 | XLD     | Severe mental retardation, dysarthria, ataxia, athetoid movements, muscle hypoplasia, and spastic paraplegia with                                                         | Delayed myelination, leukodystrophy, improving with age                                                                                         | Nystagmus; contractures, pectus excavatum, thyroid abnormalities          |

|                |                                                                         |                   |       |                                                                                                                                                                           |                                                                                                                                                                   |                                                           |
|----------------|-------------------------------------------------------------------------|-------------------|-------|---------------------------------------------------------------------------------------------------------------------------------------------------------------------------|-------------------------------------------------------------------------------------------------------------------------------------------------------------------|-----------------------------------------------------------|
|                |                                                                         |                   |       | hyperreflexia, clonus, and Babinski reflexes, quadriplegia                                                                                                                |                                                                                                                                                                   |                                                           |
| <b>SLC17A5</b> | Salla disease                                                           | 604369            | AR    | hypotonia, cerebellar ataxia, and mental retardation, athetosis, spasticity                                                                                               | Progressive cerebellar atrophy and dysmyelination                                                                                                                 | Growth retardation, nystagmus                             |
| <b>SLC19A3</b> | Thiamine metabolism dysfunction syndrome-2                              | 607483            | AR    | Subacute onset, dystonia, paraparesis, ataxia, seizures, and pyramidal signs                                                                                              | Basal ganglia lesions seen on MRI, cortical and subcortical hyperintensities                                                                                      |                                                           |
| <b>SLC2A1</b>  | GLUT1 deficiency syndrome                                               | 612126/<br>606777 | AD    | ID, paroxysmal exercise-induced dyskinesia, dystonia, choreoathetosis, seizures                                                                                           | Cerebral atrophy                                                                                                                                                  | Hypoglycorrhachia (low glucose in CSF), hemolysis         |
| <b>SLC5A6</b>  | Publication Subramanian et al Hum Genet 2017                            |                   | AR    | Spastic cerebral palsy, developmental delay, microcephaly                                                                                                                 | Brain atrophy, thin corpus callosum, wide ventricles                                                                                                              | Osteoporosis, fractures, immune deficiency, FTT           |
| <b>SLC6A1</b>  | myoclonic-atonic epilepsy                                               | 616421            | AD    | Developmental delay, myoclonic-atonic epilepsy, ID, autism, tremor, ataxia                                                                                                |                                                                                                                                                                   | Scoliosis                                                 |
| <b>SLC6A5</b>  | hyperekplexia-3                                                         | 614618            | AR    | neonatal hypertonia, an exaggerated startle response to tactile or acoustic stimuli, and life-threatening neonatal apnea episodes.                                        |                                                                                                                                                                   |                                                           |
| <b>SPAST</b>   | autosomal dominant spastic paraplegia-4                                 | 182601            | AD    | Spastic paraplegia, pyramidal signs, cognitive decline, ID                                                                                                                |                                                                                                                                                                   | Urinary incontinence                                      |
| <b>SPG11</b>   | autosomal recessive spastic paraplegia-11                               | 604360            | AR    | lower limb spasticity, slight ataxia, and mild sensory impairment, urinary urge incontinence and slow cognitive decline. Axonal loss and demyelinating sensory neuropathy | thin corpus callosum, cerebral atrophy, white matter lesions                                                                                                      |                                                           |
| <b>SPG11</b>   |                                                                         | 604360            | AR    | ID, upper-extremity weakness, dysarthria, & nystagmus                                                                                                                     | Thin corpus callosum                                                                                                                                              |                                                           |
| <b>SPR</b>     | dopa-responsive dystonia                                                | 612716            | AR    | progressive psychomotor retardation, dystonia, spasticity, ataxia, choreoathetosis. Microcephaly.                                                                         |                                                                                                                                                                   | Oculomotor apraxia, oculogyric crisis, growth retardation |
| <b>SPTBN2</b>  | spinocerebellar ataxia-5/ autosomal recessive spinocerebellar ataxia-14 | 600224/615386     | AD/AR | PMR, hypotonia, ataxic cerebral palsy, pyramidal signs                                                                                                                    | Cerebellar atrophy                                                                                                                                                | Nystagmus                                                 |
| <b>ST3GAL5</b> | Salt and pepper developmental regression syndrome                       | 609056            | AR    | Intellectual disability, choreoathetosis, epilepsy, neurological regression                                                                                               | Cerebral atrophy                                                                                                                                                  | Deafness, vision impairment, and skin findings.           |
| <b>STAT2</b>   | Pseudo-TORCH type 3                                                     | 618886            | AR    | Developmental delay, regression                                                                                                                                           | Intracranial calcifications, white matter abnormalities, cerebral or cerebellar atrophy                                                                           | Multiorgan dysfunction, poor overall growth               |
| <b>STXBP1</b>  | Epileptic encephalopathy, early infantile, 4                            | 612164            | AD    | ID, hypotonia, tremor, spastic di-/quadriparesis, seizures                                                                                                                | normal                                                                                                                                                            |                                                           |
| <b>SUOX</b>    | Sulfite oxidase deficiency                                              | 606887            | AR    | Hemiplegia, hypertonia, dystonia, ataxia, choreoathetosis                                                                                                                 |                                                                                                                                                                   | Ectopia lentis, delayed teething, exzema                  |
| <b>SURF1</b>   | Leigh syndrome                                                          | 256000            | AR    | ID, hypertonia, spasticity, ataxia, seizures                                                                                                                              | Lesions in basal ganglia, brainstem, cerebellum, thalamus, spinal cord characterized by demyelination, necrosis, gliosis, spongiosis, and capillary proliferation | Optic atrophy, nystagmus, ptosis FTT, respiratory failure |

|                    |                                                                             |        |         |                                                                                                                                                                                                                                                             |                                                                                                                                                                                    |                                                                              |
|--------------------|-----------------------------------------------------------------------------|--------|---------|-------------------------------------------------------------------------------------------------------------------------------------------------------------------------------------------------------------------------------------------------------------|------------------------------------------------------------------------------------------------------------------------------------------------------------------------------------|------------------------------------------------------------------------------|
| <b>TAF2</b>        | Mental retardation, autosomal recessive 40                                  | 615599 | AR      | ID, microcephaly, spasticity, hyperreflexia                                                                                                                                                                                                                 | Corpus callosum abnormalities, delayed myelination                                                                                                                                 | Nystagmus, pigmentary retinal changes                                        |
| <b>TECPR2</b>      | Spastic paraplegia 49, autosomal recessive                                  | 615031 | AR      | ID, developmental delay, spastic paraparesis                                                                                                                                                                                                                | Thin corpus callosum, cerebral atrophy                                                                                                                                             | Recurrent apneic episodes, gastroesophageal reflux                           |
| <b>TECPR2</b>      | Spastic paraplegia 49, autosomal recessive                                  | 615031 | AR      | Hypotonia, developmental delay, severe ID, Spastic, ataxic, & rigid gait developed in childhood. Epilepsy                                                                                                                                                   | Thin corpus callosum & cerebellar atrophy                                                                                                                                          | gastroesophageal reflux, recurrent apneic episodes, mild dysmorphic features |
| <b>TGIF1</b>       | holoprosencephaly-4                                                         | 142946 | AD      | Developmental delay, motor problems                                                                                                                                                                                                                         | Semilobar holoprosencephaly                                                                                                                                                        | Cleft lip/ palate                                                            |
| <b>TH</b>          | Segawa syndrome, tyrosin hydroxylase deficiency                             | 605407 | AR      | Ataxia, dystonia, rigidity, involuntary movements                                                                                                                                                                                                           |                                                                                                                                                                                    | Masked facies, ptosis, oculogyric crises                                     |
| <b>TPP1 (CLN2)</b> | neuronal ceroid lipofuscinosis-2                                            | 204500 | AR      | refractory epilepsy, mental regression and deterioration, ataxia, myoclonus, and visual loss.                                                                                                                                                               | Cerebral atrophy                                                                                                                                                                   | retinal degeneration                                                         |
| <b>TRAPPC12</b>    | Encephalopathy, progressive, early-onset, with brain atrophy and spasticity | 617669 | AR      | small developmental gains in infancy, regression and had severe global developmental deficits. Hypsarrhythmia. Truncal hypotonia, appendicular spasticity, dystonia and/or myoclonus, optic atrophy or cortical visual impairment, scoliosis, and dysphagia | pontine hypoplasia, partial agenesis of the corpus callosum, simplified frontal gyri, and diffuse cortical atrophy with enlarged ventricles and relative sparing of the cerebellum |                                                                              |
| <b>TREX1</b>       | Aicardi-Goutieres syndrome-1                                                | 225750 | AD/ AR  | Developmental delay, ID, spastic tetraparesis, dystonia, seizures, truncal hypotonia                                                                                                                                                                        | Intracerebral calcifications, cerebral atrophy, leukoencephalopathy                                                                                                                | Hepatomegaly, splenomegaly, chilblains, acrocyanosis of feet                 |
| <b>TSEN15</b>      | Pontocerebellar hypoplasia, type 2F                                         | 617026 | AR      | cognitive and motor delay, poor or absent speech, seizures, and spasticity                                                                                                                                                                                  | hypoplasia of the cerebellum and pons                                                                                                                                              |                                                                              |
| <b>TSEN2</b>       | Pontocerebellar hypoplasia type 2B                                          | 612389 | AR      | No psychomotor development, spasticity, dystonia, dyskinesia, axial hypotonia, opisthotonus, seizures                                                                                                                                                       | Cerebellar atrophy, brainstem hypoplasia, pontine atrophy, ventricular dilatation, thin corpus callosum                                                                            | Central visual impairment, feeding difficulties, microcephaly                |
| <b>TSEN54</b>      | pontocerebellar hypoplasia type 2A                                          | 277470 | AR      | ID, spasticity, dyskinesia, seizures                                                                                                                                                                                                                        | Pontine hypoplasia, cerebellar hypoplasia (predominantly hemispheres), dragonfly-like pattern                                                                                      | Central visual impairment                                                    |
| <b>TTPA</b>        | Ataxia with isolated vitamin E deficiency                                   | 277460 | AR      | Ataxia, areflexia, early onset                                                                                                                                                                                                                              |                                                                                                                                                                                    |                                                                              |
| <b>TUBA1A</b>      | lissencephaly-3                                                             | 611603 | AD      | ID, spastic tetraplegia, ataxia, seizures                                                                                                                                                                                                                   | Pachygyria, PMG, thin cc, ventricular dilatation                                                                                                                                   |                                                                              |
| <b>TUBA8</b>       | Cortical dysplasia, complex, with other brain malformations 8               | 613180 | AR      | Profound developmental delay, seizures, hypotonia                                                                                                                                                                                                           | Thickened cortex, polymicrogyria, corpus callosum agenesis, colpocephaly, hypoplastic brain stem                                                                                   |                                                                              |
| <b>TUBB/ TUBB5</b> | Cortical dysplasia, complex, with other brain malformations 6               | 615771 | AD (DN) | Severe developmental delay, ataxia                                                                                                                                                                                                                          | Dysmorphic basal ganglia, corpus callosum abnormalities, White matter streaks, brainstem hypoplasia, cerebellar hypoplasia                                                         | ophthalmological findings                                                    |



|               |                                                               |                |         |                                                                                                                                                                                                                                                       |                                                                                                                                                        |                                                                                                          |
|---------------|---------------------------------------------------------------|----------------|---------|-------------------------------------------------------------------------------------------------------------------------------------------------------------------------------------------------------------------------------------------------------|--------------------------------------------------------------------------------------------------------------------------------------------------------|----------------------------------------------------------------------------------------------------------|
| <b>TUBB2A</b> | Cortical dysplasia, complex, with other brain malformations 5 | 615763         | AD (DN) | Developmental delay, ID seizures, hypotonia                                                                                                                                                                                                           | Thin corpus callosum, enlarged ventricles, basal ganglia abnormalities                                                                                 |                                                                                                          |
| <b>TUBB2B</b> | Cortical dysplasia, complex, with other brain malformations 7 | 610031         | AD (DN) | Developmental delay, ID, seizures, spasticity                                                                                                                                                                                                         | Malformations of cortical development, cerebellar hypoplasia, corpus callosum abnormalities                                                            |                                                                                                          |
| <b>TUBB3</b>  | Cortical dysplasia, complex, with other brain malformations 1 | 614039         | AD (DN) | Developmental delay, ID, axial hypotonia, spasticity, seizures                                                                                                                                                                                        | Malformations of cortical development, dysmorphic basal ganglia, dysplastic cerebellar vermis, corpus callosum abnormalities                           | Strabism, nystagmus                                                                                      |
| <b>TUBB4A</b> | Leukodystrophy, hypomyelinating, 6                            | 612438         | AD (DN) | delayed motor development and gait instability, followed by extrapyramidal movement disorders, such as dystonia, choreoathetosis, rigidity, opisthotonus, and oculogyric crises, progressive spastic tetraplegia, ataxia, and, more rarely, seizures. | combination of hypomyelination, cerebellar atrophy, and atrophy or disappearance of the putamen                                                        |                                                                                                          |
| <b>TUBG1</b>  | Cortical dysplasia, complex, with other brain malformations 4 | 615412         | AD (DN) | Developmental delay, spastic tetraplegia, seizures                                                                                                                                                                                                    | Agyria, pachygyria, dysmorphic corpus callosum, subcortical band heterotopia                                                                           | Cataract                                                                                                 |
| <b>UBE3A</b>  | Angelman syndrome                                             | 105830         | AD      | Developmental delay, ID, wide-based gait, hyperreflexia, hypotonia, ataxia, seizures                                                                                                                                                                  | Mild cortical atrophy                                                                                                                                  | Feeding difficulties, facial dysmorphisms, strabism                                                      |
| <b>USP18</b>  | Pseudo-Torch syndrome 2                                       | 617397         | AR      | Hypotonia, seizures, lethargy                                                                                                                                                                                                                         | Enlarged ventricles, cortical destruction, cerebellar hypoplasia, abnormal neuronal migration, cerebral calcification                                  | Hepatomegaly, thrombocytopenia, respiratory insufficiency, extracranial calcifications, infantile demise |
| <b>VPS11</b>  | Leukodystrophy, hypomyelinating, 12                           | 616683         | AR      | severe global developmental delay apparent since infancy, poor speech or absence of speech, central hypotonia, microcephaly, and poor overall growth. Additional features included seizures, limb hypertonia, joint contractures                      | enlarged ventricles, decreased periventricular white matter, hypoplastic corpus callosum, and signal abnormalities of the supratentorial white matter. | hearing loss, central visual impairment, optic atrophy.                                                  |
| <b>VPS37A</b> | Spastic paraplegia 53, autosomal recessive                    | 614898         | AR      | developmental delay, progressive lower-extremity spasticity, & subsequently progressive upper-extremity involvement, mild-to-moderate ID                                                                                                              |                                                                                                                                                        | skeletal dysmorphism (kyphosis & pectus carinatum, variable hypertrichosis                               |
| <b>VPS53</b>  | Pontocerebellar hypoplasia, type 2E                           | 615851         | AR      | Profound developmental delay, ID, seizures, spastic quadriplegia, opisthotonus                                                                                                                                                                        | Cerebral atrophy, cerebellar atrophy, thin corpus callosum                                                                                             | Short stature, microcephaly, optic atrophy, osteoporosis, distal limb edema                              |
| <b>YY1AP1</b> | Grange syndrome                                               | 602531         | AR      | Mild-moderate intellectual disability                                                                                                                                                                                                                 | Thalamic hemorrhage infantile, cerebral hemorrhage, ischemic cerebrovascular disease                                                                   | Renovascular hypertension, bone fragility                                                                |
| <b>ZC4H2</b>  | Wieacker-Wolff syndrome                                       | 314580, 301041 | XLR/D   | ID, hypotonia, spasticity, arthrogryposis multiplex congenita, seizures                                                                                                                                                                               |                                                                                                                                                        | Short stature, narrow thorax, facial dysmorphisms                                                        |

|                      |                                           |        |    |                                              |                                                                    |                                         |
|----------------------|-------------------------------------------|--------|----|----------------------------------------------|--------------------------------------------------------------------|-----------------------------------------|
| <b>ZFYVE26</b>       | spastic paraplegia-15                     | 270700 | AR | ID, spasticity, ataxia, neuropathy           | Thin corpus callosum, white matter abnormalities, cerebral atrophy | hearing deficit, retinal abnormalities, |
| <b>ZIC2</b>          | holoprosencephaly-5                       | 609637 | AD | ID, motor problems                           | Hydrocephalus, holoprosencephaly                                   | Facial dysmorphisms, cleft lip/ palate  |
| <b>ZNF238=ZBTB18</b> | Mental retardation, autosomal dominant 22 | 612337 | AD | ID, spastic diplegia, microcephaly, seizures | Corpus callosum abnormalities                                      |                                         |

**Supplementary Table 1. Overview of genes associated with cerebral palsy or cerebral palsy mimics, their associated condition, inheritance pattern and clinical characteristics.** AD, autosomal dominant; AR, autosomal recessive; XLR, X-linked recessive; XLD, X-linked dominant; DN, *de novo*; ID, intellectual disability; FTT, failure to thrive; CP, cerebral palsy; SLE, systemic lupus erythematosus.
